# Supplementary material for: Alanine based coordinating ligand mediated hydrothermal synthesis of CuS nano/microstructures and morphology dependent photocatalysis
Source: Royal Society of Chemistry journal article supplement (doi:10.1039/c4ce02461c), 2015-01-01
Supplement: c4ce02461c1.pdf [file c4ce02461c1.pdf]

## Alanine based coordinating ligands mediated hydrothermal synthesis of CuS nano/microstructures and morphology dependent photocatalysis

V. Vinod Kumar, P. S. Hariharan, D. Eniyavan, Natarajan Hari and Savarimuthu

Philip Anthony\*

School of Chemical & Biotechnology, SASTRA University, Thanjavur-613401,

Tamil Nadu, India. Fax: +914362264120; Tel: +914362264101; E-mail:

[philip@biotech.sastra.edu](mailto:philip@biotech.sastra.edu)

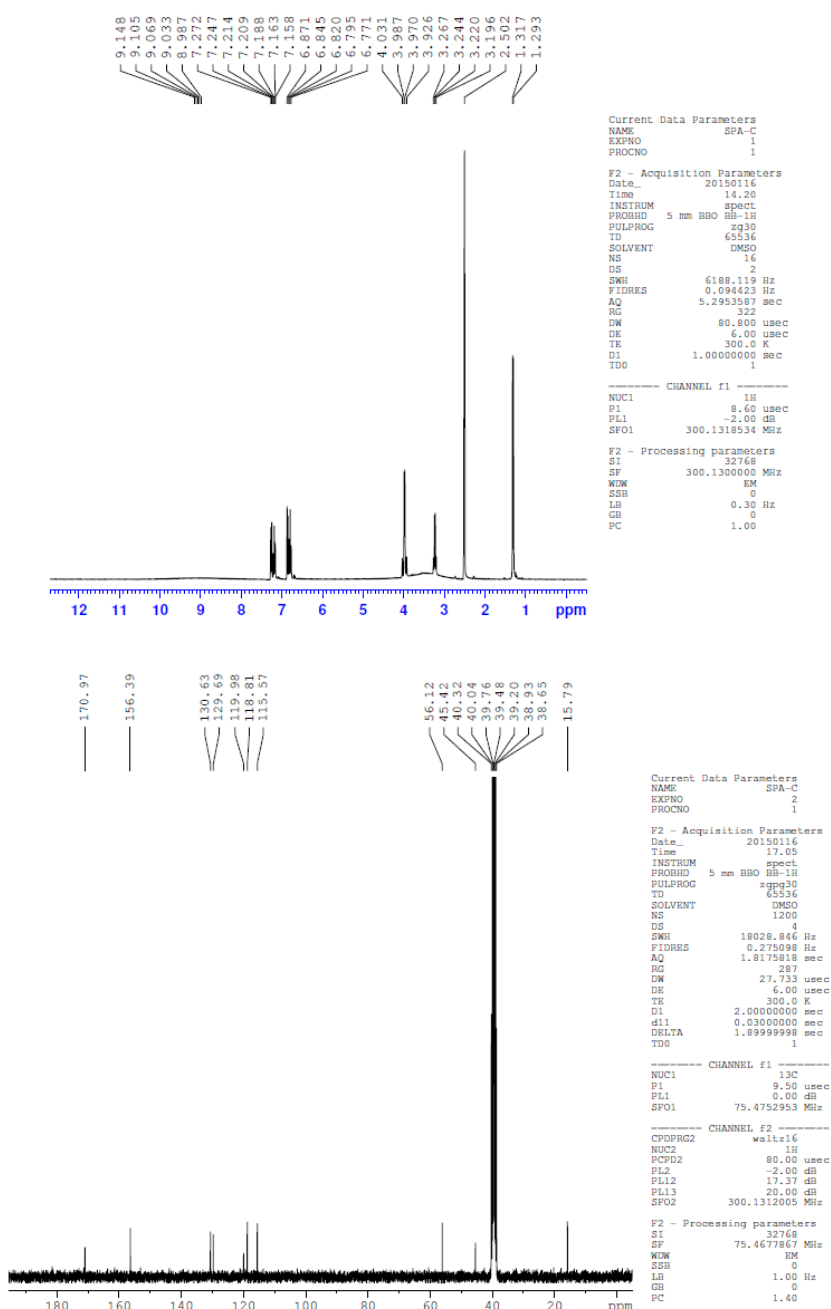

Figure S1. <sup>1</sup>H and <sup>13</sup>C-NMR spectra of 2.

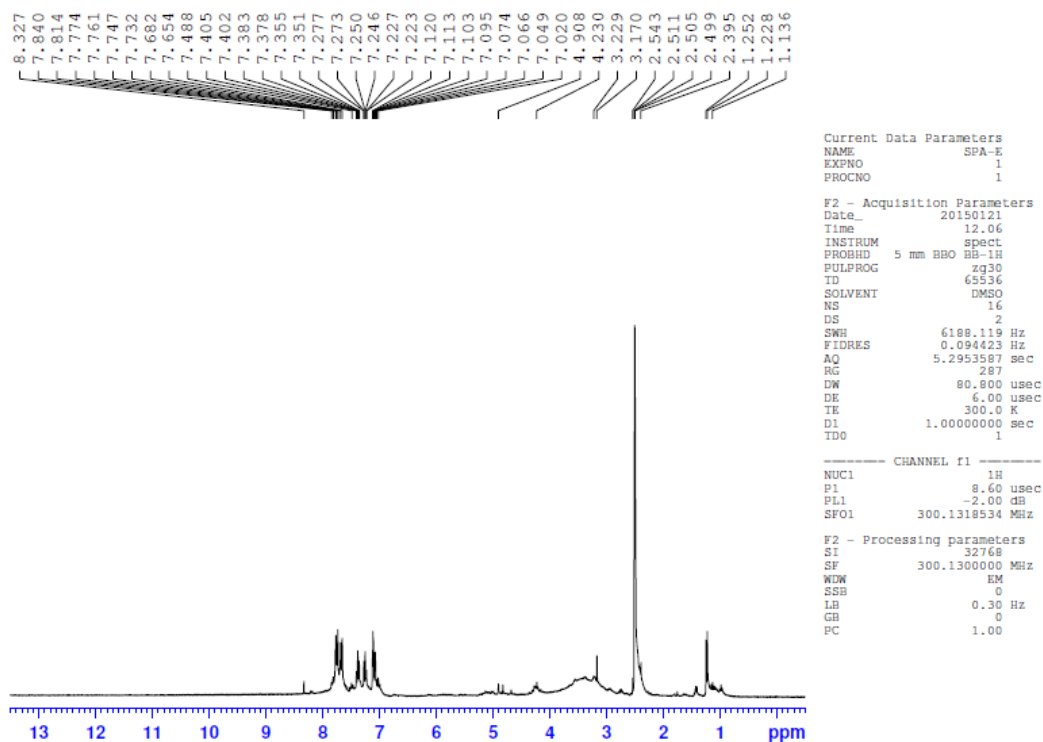

Figure S2.  $^1\text{H}$  and  $^{13}\text{C}$ -NMR spectra of 3.

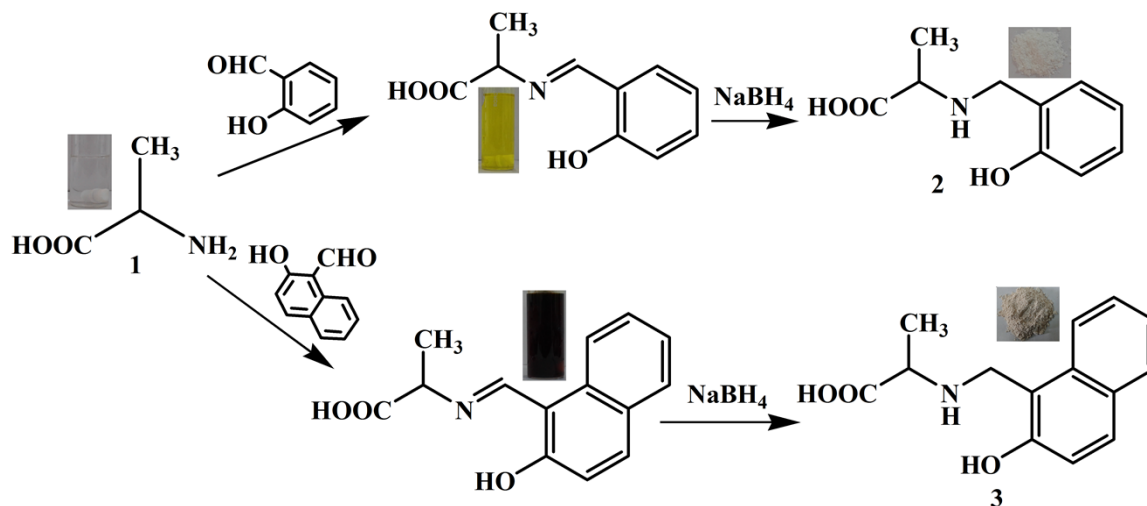

Scheme S3. Synthesis of reduced Schiff base ligands (2 and 3) using alanine and different aldehyde. The solution colours in the course of reaction are given in the inset.

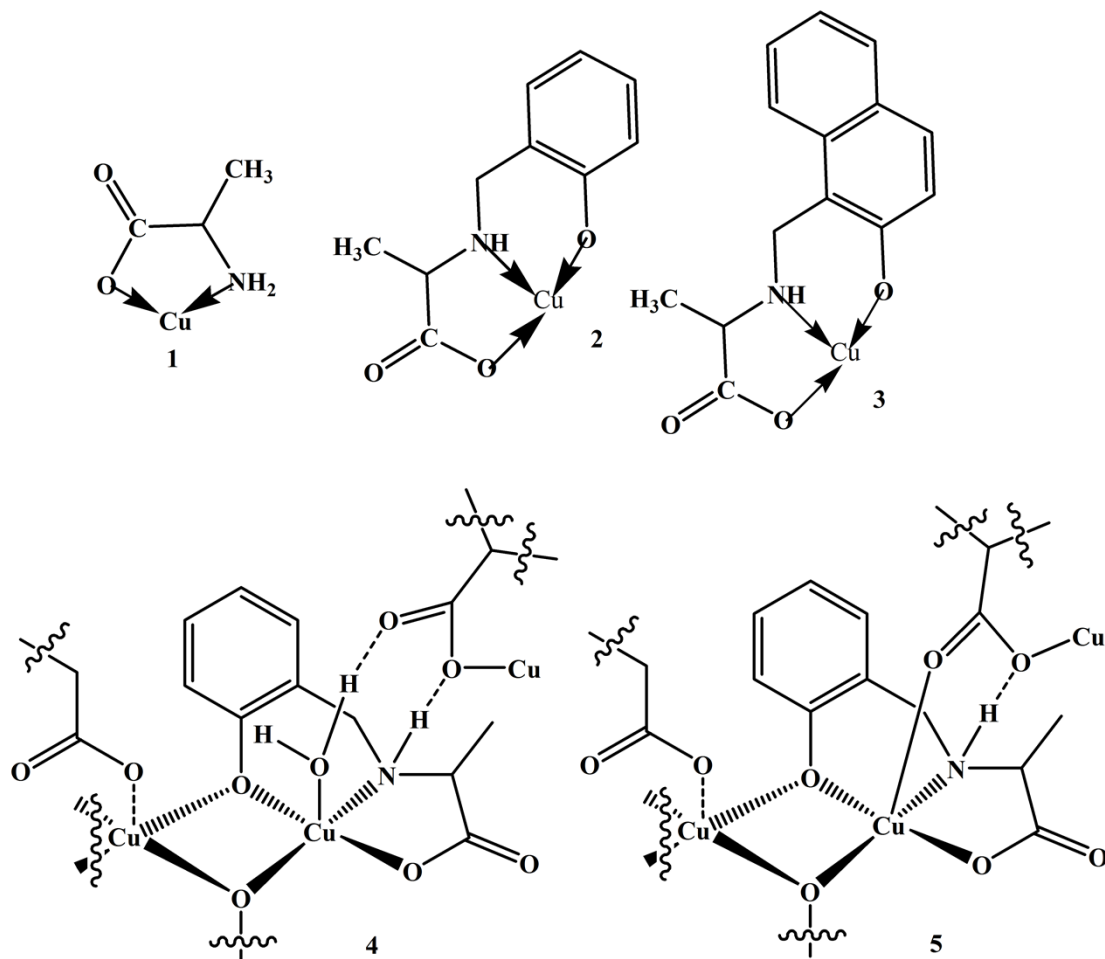

Scheme S4. Possible coordination mode of alanine and alanine based reduced Schiff base ligands (1-3) with Cu<sup>2+</sup> metal ions. The coordination environment of Cu<sup>2+</sup> in coordination polymer 4 and 5 (based on reference no. 23b single crystal structure analysis).

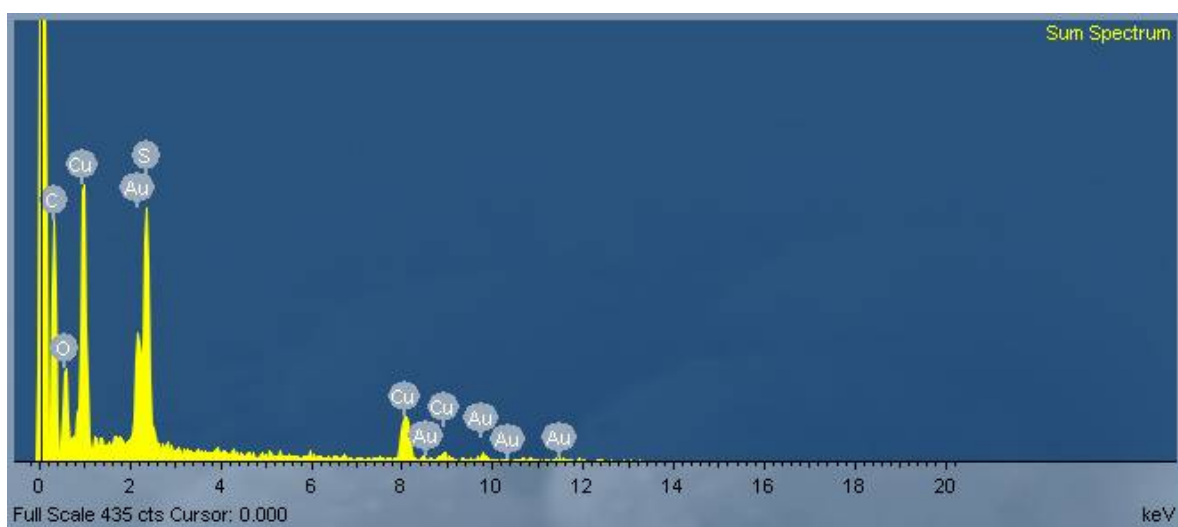

Scheme S5. EDS spectrum of 2-CuS with all peak compared with the data base.

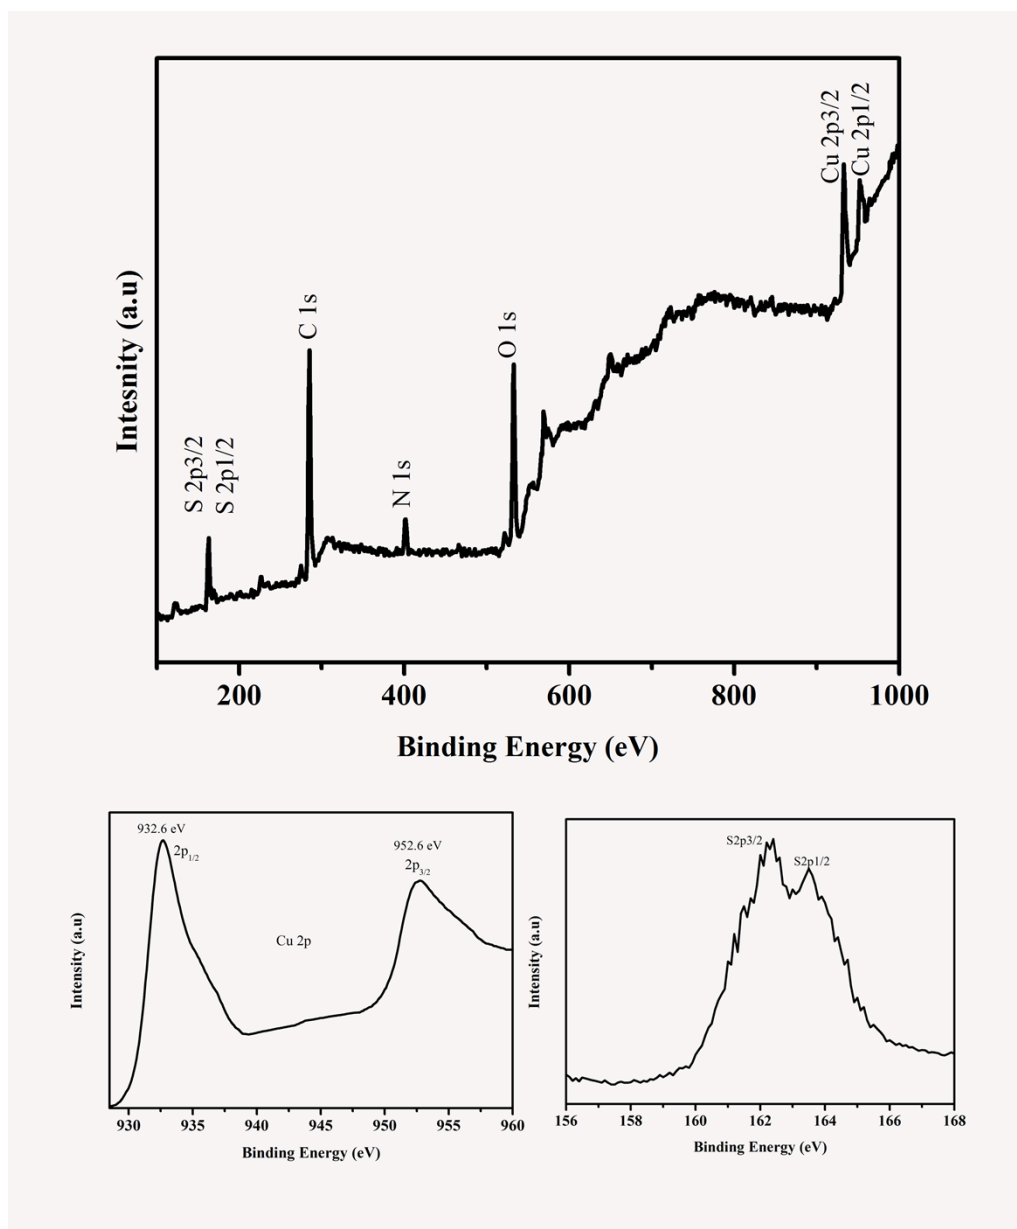

Figure S6. XPS spectra of the survey of 2-CuS, XPS spectra of close-up survey in the Cu2p and S2p region.

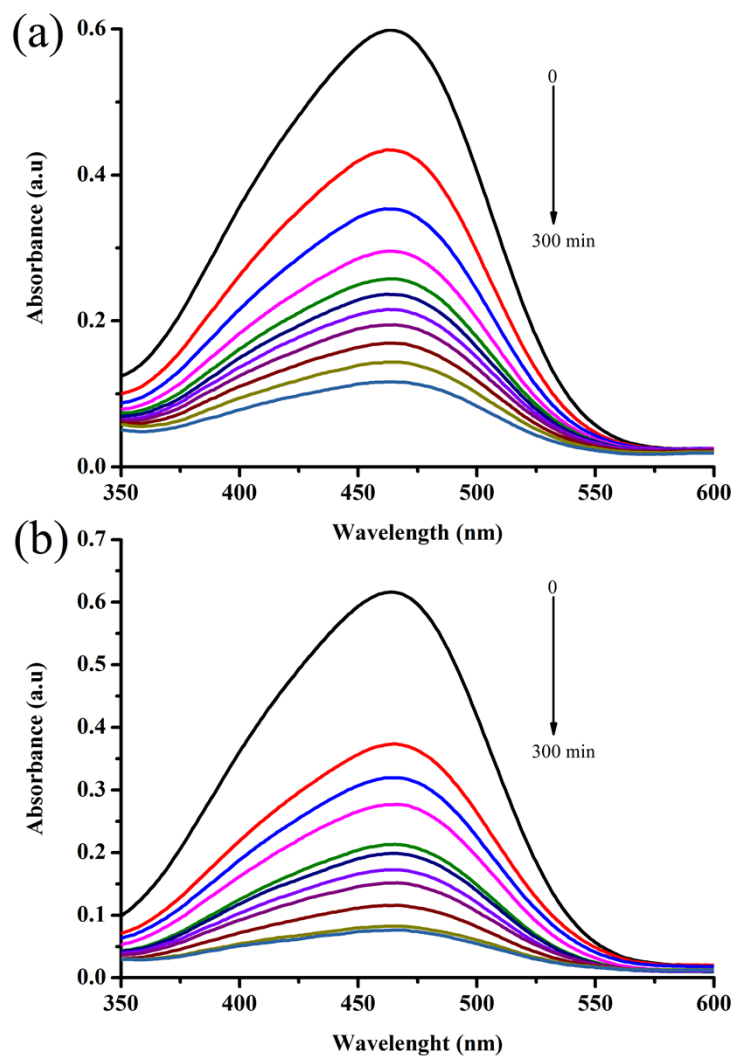

Figure S7. Photodegradation studies of MO with 2-CuS (a) without and (b) with  $H_2O_2$ .

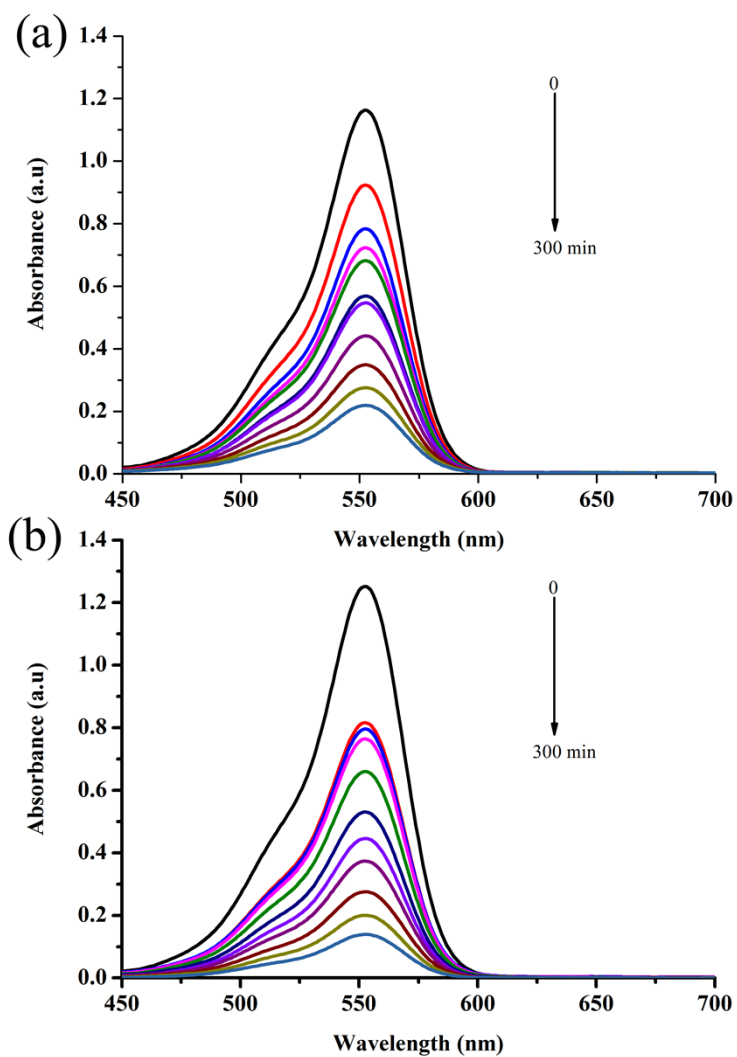

Figure S8. Photodegradation studies of RB with 2-CuS (a) without and (b) with H<sub>2</sub>O<sub>2</sub>.

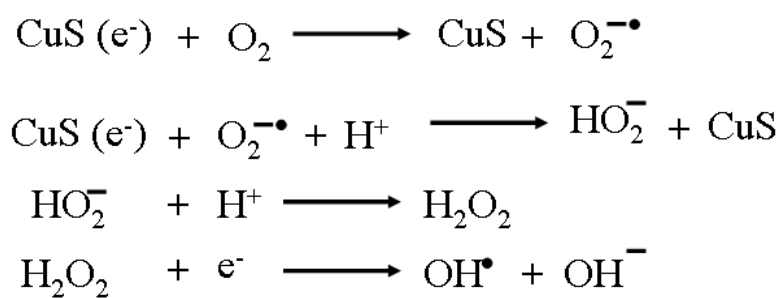

Figure S9. Mechanism of hydroxyl radical formation using CuS without H<sub>2</sub>O<sub>2</sub>.
